# Supplementary material for: DR region of Na+-K+-ATPase is a new target to protect heart against oxidative injury
Source: PubMed Central journal article supplement (PMC6117330; doi:10.1038/s41598-018-31460-z), 2018-08-30

# **DR region of Na<sup>+</sup>-K<sup>+</sup>-ATPase is a new target to protect heart against oxidative injury**

Fei Hua, Zhiyuan Wu, Xiaofei Yan, Jin Zheng, Haijian Sun,  
Xu Cao, Jin-Song Bian

Fig 1b

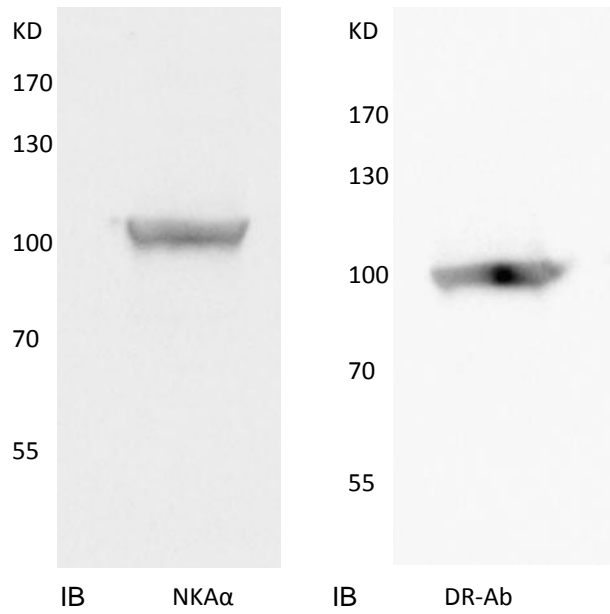

Fig 1c

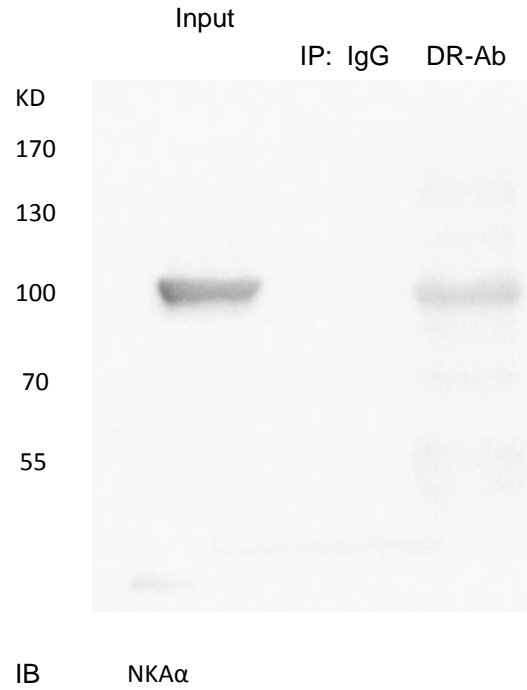

Fig 3b

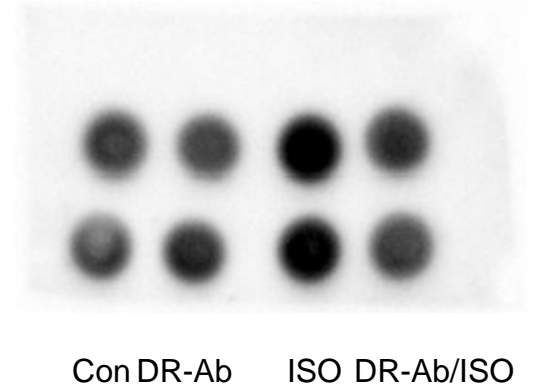

Fig 2e

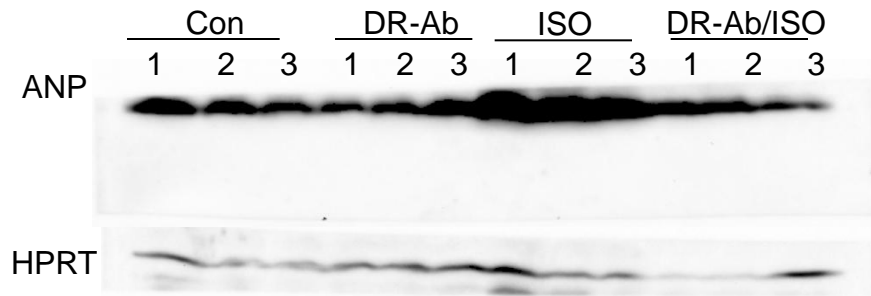

Fig 8f

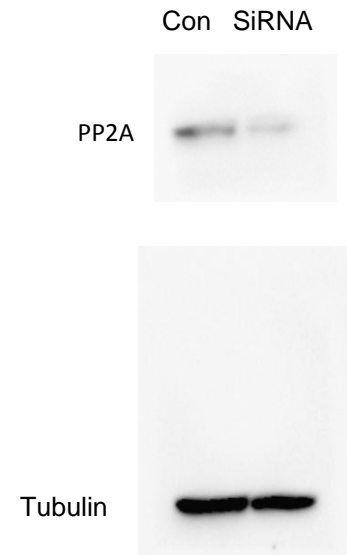

Fig 5b

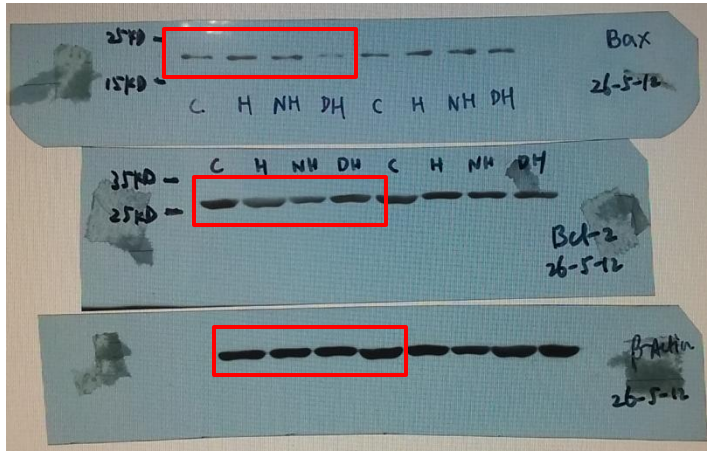

Fig 8a

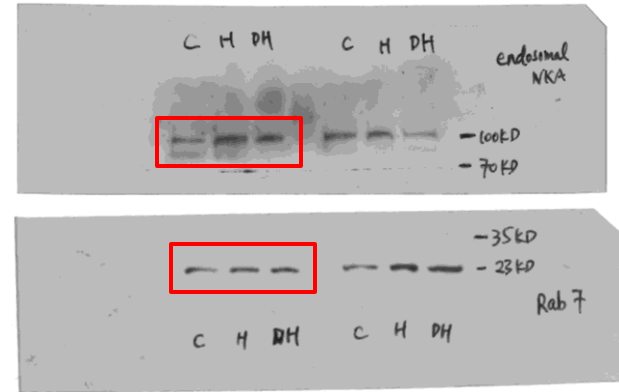

Fig 6b

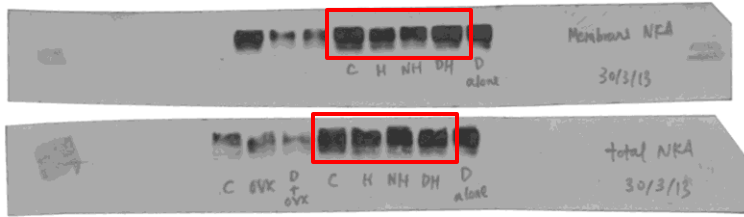

Fig 8b

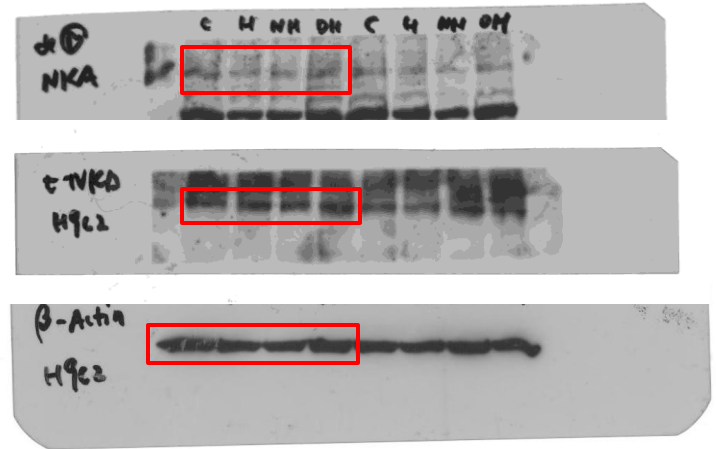

Fig 6c

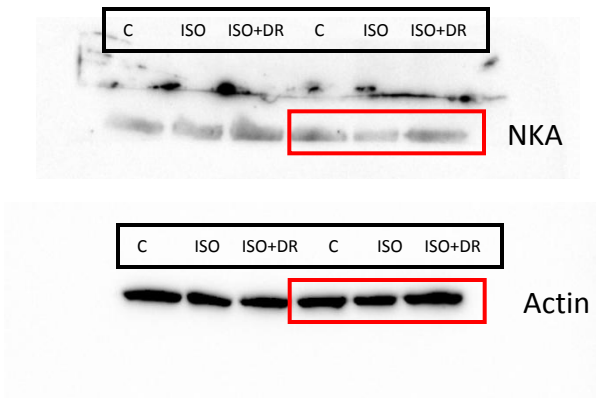

Fig 8c

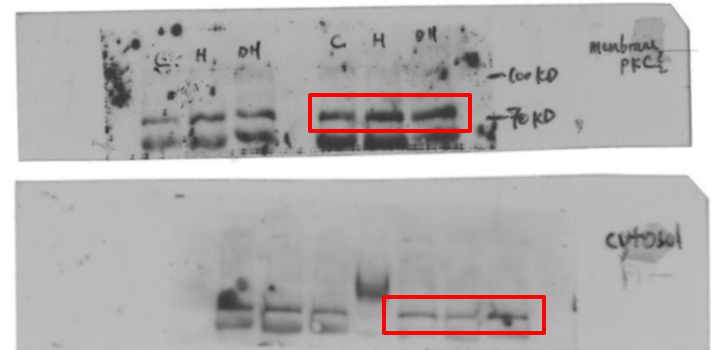

Supplement: 41598_2018_31460_MOESM1_ESM.pdf [file 41598_2018_31460_MOESM1_ESM.pdf]
